# Supplementary material for: In Vitro Cyto- and Genotoxicity Assessment of Antibacterial Paints with Triclosan and Isoborneol
Source: MDPI journal article supplement (doi:10.3390/toxics10020058), 2022-01-27
Supplement: s1 [file s1]

# Supplementary Materials: In Vitro Cyto- and Genotoxicity Assessment of Antibacterial Paints with Triclosan and Isoborneol

Micaela Machado Querido, Fernanda Rosário, Maria João Bessa, Francisca Mendes, José Carlos Teixeira, João Paulo Teixeira and Cristiana Costa Pereira

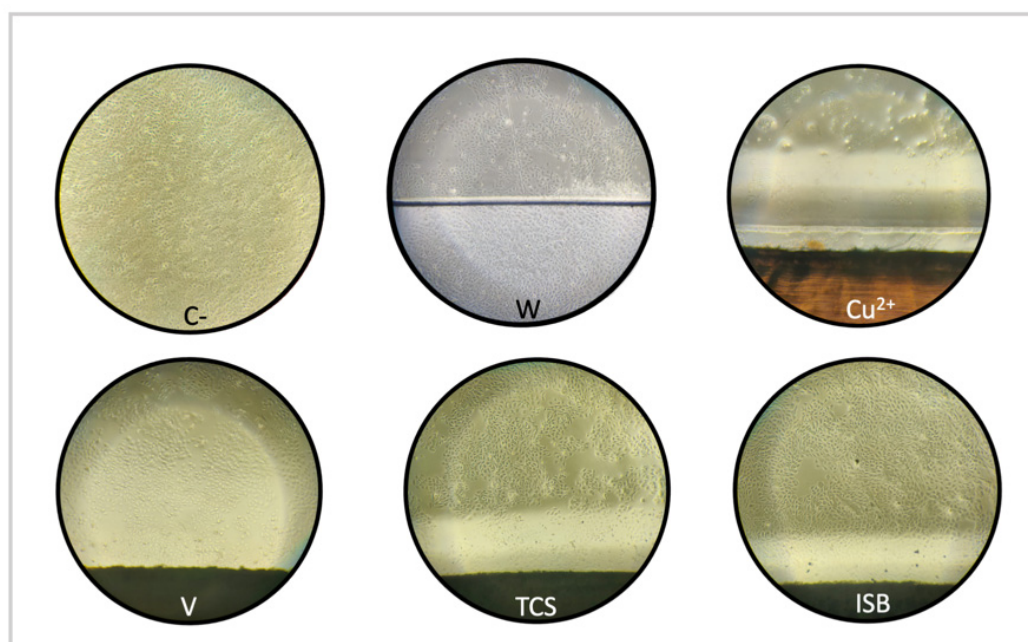

**Figure S1.** Microscopic images (100× magnification) of the HacaT cells with complete medium used as negative control (C-) or after 24h of incubation in direct contact with the samples Unmodified paint (Un\_Paint), Triclosan (TCS), Isoborneol (ISB), Transparent polymeric film (W) and Cooper ( $\text{Cu}^{2+}$ ).
